# Supplementary material for: No changes in overall AMOC strength in interglacial PMIP4 time slices
Source: Copernicus journal article supplement (doi:10.5194/cp-19-107-2023), 2023-01-12
Supplement: Supplementary file 1 [file cp-19-107-2023-supplement.pdf]

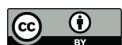

## *Supplement of*

# **No changes in overall AMOC strength in interglacial PMIP4 time slices**

**Zhiyi Jiang et al.**

*Correspondence to:* Zhiyi Jiang (z.jiang.17@ucl.ac.uk)

The copyright of individual parts of the supplement might differ from the article licence.

# Supplement

Fig. 5 in the main text shows the estimated maximum contribution of AMOC-related temperature changes to the *mid-Holocene* annual mean temperature anomalies. Equivalents for the AMOC-induced precipitation contributions in each model end up looking rather messy, mainly because both the AMOC fingerprint and the *midHolocene* changes are spatially heterogeneous with several location of no changes in precipitation. To increase the clarity of the precipitation contributions, we choose  
5 instead to present the ensemble mean of the percentage of precipitation changes that could be explained by AMOC changes.

All the models are first regridded onto a common  $1^\circ \times 1^\circ$  grid, then the ensemble mean AMOC-induced precipitation changes ( $\overline{\Delta P_\Psi}$ ) are computed, as are the ensemble mean simulated precipitation changes ( $\overline{\Delta P}$ ). The ratio of these to ensemble mean fields ( $\overline{\Delta P_\Psi} / \overline{\Delta P}$ ) is shown in the Figure below.

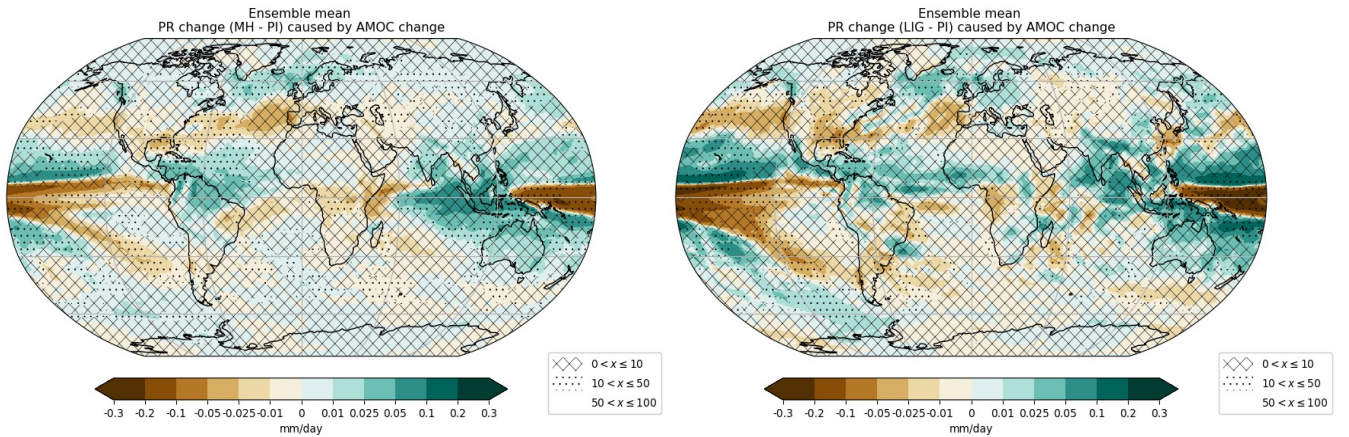

**Figure 1.** Ensemble mean plot of the precipitation changes caused by AMOC changes ( $\overline{\Delta P_\Psi}$ ) at the *midHolocene* (left) and *lig127k* (right). Overlaid markers provide, the percentage of those changes that could potentially be explained by AMOC changes ( $100 \times \overline{\Delta P_\Psi} / \overline{\Delta P}$ ): no shading indicates that AMOC contributes half or more of the changes (>50%) seen in the experiment, whilst the dotted symbol indicates a small contribution (10-50%). Areas where there this no AMOC contribution (<10%) are covered by crosshatching.
